1 **TITLE: A survey of DNA methylation polymorphism identifies**  
2 **environmentally responsive co-regulated networks of epigenetic**  
3 **variation in the human genome**

4  
5 Authors: Paras Garg<sup>1</sup>, Ricky S. Joshi<sup>1</sup>, Corey Watson<sup>1</sup>, Andrew J. Sharp<sup>1</sup>

6  
7 <sup>1</sup> Department of Genetics and Genomic Sciences, Icahn School of Medicine at Mount  
8 Sinai, New York, New York 10029, USA

9  
10 Address for correspondence: Andrew J. Sharp, Department of Genetics and Genomic  
11 Sciences, Mount Sinai School of Medicine, Hess Center for Science and Medicine,  
12 1470 Madison Avenue, Room 8-116, Box 1498, New York, NY 10029 USA. Telephone:  
13 +1-212-824-8942, Fax: +1-646-537-8527, Email: [andrew.sharp@mssm.edu](mailto:andrew.sharp@mssm.edu)

14  
15 Running title: DNA methylation polymorphism in human genome

16 Keywords: DNA methylation; Epigenetics; Population genetics; HOX genes; Cell culture

17

18

19

20

21

22

23

24 **ABSTRACT**

25 While studies such as the 1000 Genomes Projects have resulted in detailed maps of  
26 genetic variation in humans, to date there are few robust maps of epigenetic variation.  
27 We defined sites of common epigenetic variation, termed Variably Methylated Regions  
28 (VMRs) in five purified cell types. We observed that VMRs occur preferentially at  
29 enhancers and 3' UTRs. While the majority of VMRs have high heritability, a subset of  
30 VMRs within the genome show highly correlated variation in *trans*, forming co-regulated  
31 networks that have low heritability, differ between cell types and are enriched for  
32 specific transcription factor binding sites and biological pathways of functional relevance  
33 to each tissue. For example, in T cells we defined a network of 72 co-regulated VMRs  
34 enriched for genes with roles in T-cell activation; in fibroblasts a network of 21 co-  
35 regulated VMRs comprising all four *HOX* gene clusters enriched for control of tissue  
36 growth; and in neurons a network of 112 VMRs enriched for roles in learning and  
37 memory. By culturing genetically-identical fibroblasts under varying conditions of  
38 nutrient deprivation and cell density, we experimentally demonstrate that some VMR  
39 networks are responsive to environmental conditions, with methylation levels at these  
40 loci changing in a coordinated fashion in *trans* dependent on cellular growth. Intriguingly  
41 these environmentally-responsive VMRs showed a strong enrichment for imprinted loci  
42 ( $p < 10^{-94}$ ), suggesting that these are particularly sensitive to environmental conditions.  
43 Our study provides a detailed map of common epigenetic variation in the human  
44 genome, showing that both genetic and environmental causes underlie this variation.  
45

## 46 INTRODUCTION

47 Understanding the causes and consequences of genomic variation among humans is  
48 one of the major goals in the field of genetics. Over the past decade, studies such as  
49 the Hapmap and 1000 Genomes Projects have resulted in detailed maps of genetic  
50 variation in diverse human populations, identifying millions of single nucleotide  
51 polymorphisms, copy number variants and other types of sequence variation (The  
52 International HapMap Consortium, 2005; The International HapMap Consortium, 2007;  
53 The International HapMap Consortium, 2010; Abecasis et al., 2012; Sudmant et al.,  
54 2015; Auton et al., 2015). These maps have acted as the catalysts for thousands of  
55 genome-wide association studies (Welter et al., 2014), and have provided insights into  
56 diverse processes such as mechanisms of human disease, mutation, evolution,  
57 migration, selection and recombination (Sabeti et al., 2002; Myers et al., 2005; McEvoy  
58 et al., 2011; Zaidi et al., 2013).

59 However, alterations of the primary DNA sequence are not the only type of  
60 genomic variations that occur among humans. In particular there are now well-  
61 documented examples of epigenetic marks, such as DNA methylation and histone  
62 modifications, that show significant inter-individual variation (Ollikainen et al., 2010; Oey  
63 et al., 2015; McDaniell et al., 2010;). However, in contrast to sequence polymorphism,  
64 relatively few studies have examined the distribution of epigenetic variation across the  
65 genome, and as a result our understanding of the causes and consequences of  
66 epigenetic polymorphism remains limited.

67 Familial and twin studies in human and mice have shown that a substantial  
68 fraction of sites showing variable DNA methylation levels are highly heritable, and for

69 some loci this epigenetic polymorphism has been linked with nearby genetic variation  
70 (Ollikainen et al., 2010; Oey et al., 2015; Gertz Oey et al., 2011; Grundberg et al., 2012;  
71 Grundberg et al., 2013; Gordon et al., 2012; McRae et al., 2014; Busche et al., 2015;  
72 Gibbs et al., 2010; Zhang et al., 2010; Gutierrez-Arcelus et al., 2013; Heyn et al., 2013).  
73 However, these same studies have also demonstrated that a subset of methylation  
74 variation exhibits low heritability (Ollikainen et al., 2010; Grundberg et al., 2012;  
75 Grundberg et al., 2013; Gordon et al., 2012; Gervin et al., 2011). While stochastic  
76 variation could explain reduced heritability levels, differing environmental exposures  
77 such as smoking (Breitling et al., 2011, Joubert et al., 2012; Tsaprouni et al., 2014),  
78 diet/in-utero environment (Waterland et al., 2010; Dominguez-Salas et al., 2014; Kok et  
79 al., 2015) and stress (Unternaehrer et al., 2012; Donkin et al., 2015) have all been  
80 shown to modify the epigenome. In addition, other natural processes such as aging and  
81 X chromosome inactivation apparently underlie epigenetic variation of some  
82 sites(Christensen et al. 2009; Day et al., 2013; Cotton et al., 2014). Whatever the root  
83 cause of epigenetic polymorphism, several studies have demonstrated that a subset of  
84 these variations are functionally significant and associate with the expression levels of  
85 nearby genes (Gutierrez-Arcelus et al., 2013; Liu et al., 2013). Accordingly there is now  
86 substantial interest in elucidating the role of epigenetic variation in a variety of disease  
87 phenotypes (Bell et al., 2014; Davies et al., 2014; Huynh et al., 2014; Watson et al.,  
88 2016; Multhaup et al., 2015; Benton et al., 2015; Javierre et al., 2010; Lunnon et al.,  
89 2014; Pidsley et al., 2014), indicating that the study of epigenetic polymorphism holds  
90 significant promise for understanding the molecular etiology of disease.

91           In this study, we have performed a screen to identify regions of common  
92 epigenetic variation using population data derived from five different human cell types.  
93 We uncover hundreds of loci in the human genome that exhibit highly polymorphic DNA  
94 methylation levels, that we term variably methylated regions (VMRs). We show that  
95 VMRs co-localize with other functional genomic features, are enriched for CpGs that  
96 influence gene expression, and provide evidence that epigenetic variability at some of  
97 these loci is influenced by both genetic and environmental factors. We also show that  
98 VMRs form *cis* and *trans* co-regulated networks enriched for transcription factor binding  
99 sites and genes with cell-type relevant functions. Finally, consistent with the notion that  
100 the epigenome represents a dynamic link between our genome and the environment  
101 (Liu et al., 2008; Tammen et al., 2013), we experimentally demonstrate effects of  
102 nutrition deprivation on methylation at VMRs in cultured fibroblasts, revealing signatures  
103 that overlap those observed in our population-level datasets. Together, our results  
104 provide novel insights into the biology of variable methylation across the human  
105 genome.  
106

107 **RESULTS**

108

109 ***Identification of polymorphic DNA methylation in five human cell types***

110 We performed an analysis of inter-individual variation of DNA methylation in five  
111 isolated cell types from two human cohorts (Fig. 1A): 1) Primary fibroblasts, EBV-  
112 immortalized lymphoblastoid cells, and phytohemagglutinin stimulated primary T cells  
113 taken from umbilical cords of 204 newborns (Gutierrez-Arcelus et al., 2013); and 2)  
114 sorted glia and neurons from prefrontal cortical tissue from 57 deceased donors  
115 (Guintivano et al., 2013). Genome-wide methylation profiles were previously generated  
116 for all samples using the Illumina Infinium HumanMethylation450 BeadChip (450k array)  
117 (Illumina, San Diego, CA, USA). After filtering (see Methods), we analyzed methylation  
118 profiles for 316,452 filtered autosomal CpGs in each of the five cell types. We utilized a  
119 sliding window approach (Fig. 1B) to characterize VMRs composed of multiple  
120 neighboring CpGs exhibiting consistent polymorphic variation in methylation levels  
121 among samples within each cell type.

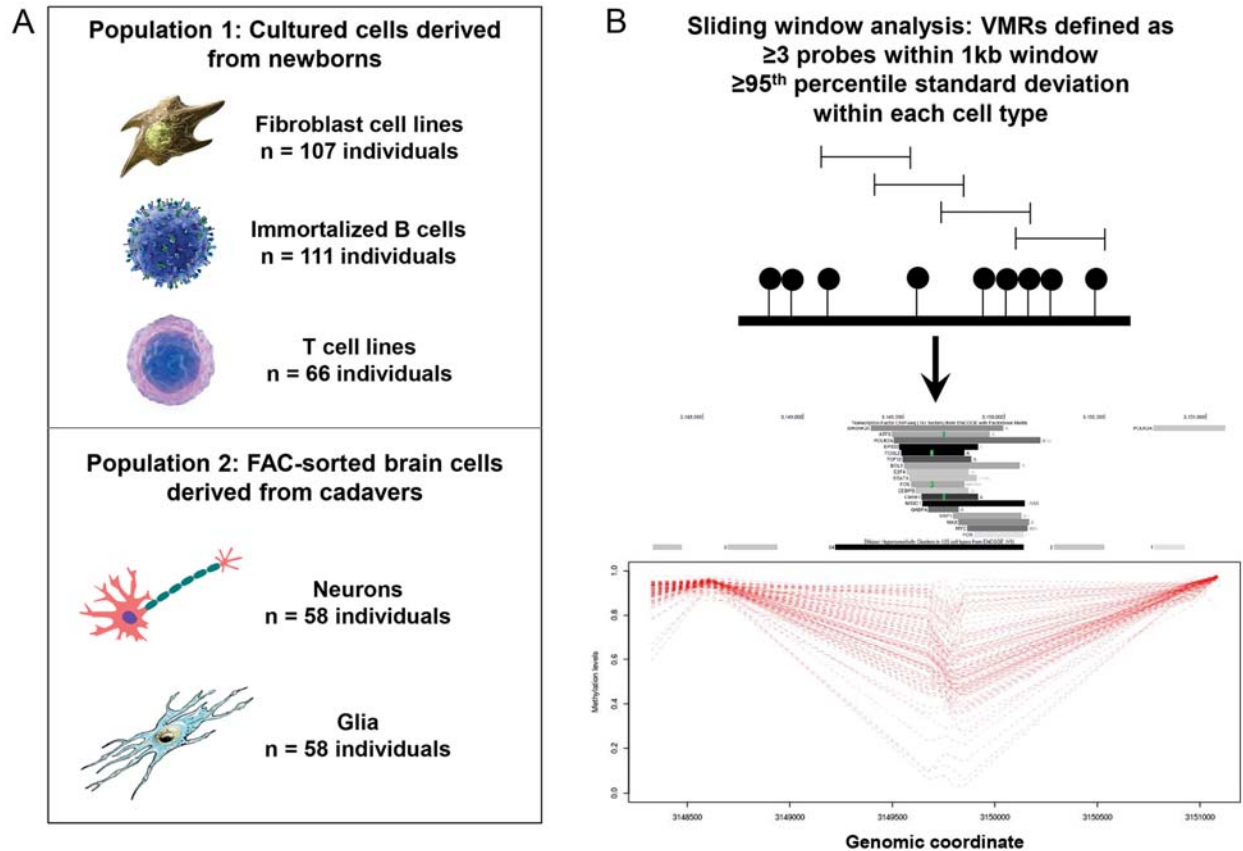

122

123 **Figure 1. (A)** We studied population variability of DNA methylation in five different purified cell types  
124 derived from blood, skin and brain. **(B)** Utilizing a 1kb sliding window we identified Variably Methylated  
125 Regions (VMRs), representing clusters of  $\geq 3$  probes within the top 5% of population variability within each  
126 cell type. **(C)** An example VMR identified at *PFKP* in fibroblasts. As indicated by the accompanying UCSC  
127 Genome Browser tracks, ENCODE data identifies this locus as a DNaseI hypersensitive site and cell-type  
128 specific enhancer bound by several different TFs. Dashed red lines represent DNA methylation profiles  
129 for each of the 107 cell lines from the GenCord population, showing extreme epigenetic variability at this  
130 locus in the normal population.

131

132 In total, we identified 537 VMRs in fibroblasts, 1,168 VMRs in T cells, 580 VMRs  
133 in B cells, 846 VMRs in neuronal cells and 890 VMRs in glial cells. Hereafter, these  
134 VMRs are abbreviated as FVMRs, TVMRs, BVMRs, NVMRs and GVMRs, respectively.

135 Genomic positions and relevant annotations for VMRs partitioned by cell type are  
136 provided in Supplementary Table S1. VMRs had a mean size of 875bp, and contained a  
137 mean of 6.5 CpGs.

138 While many characterized VMRs were specific to a given cell type, others were  
139 common across cell types and tissues. Examples of cell-type specific and shared VMRs  
140 are displayed in Fig. 2A. The extent of VMR sharing between different tissues was  
141 related to their relative developmental origin. For example, approximately one third of  
142 VMRs identified in glia were also found in neurons, and ~60% of VMRs found in B cells  
143 were observed in T cells. In contrast only 22% of VMRs found in fibroblasts were also  
144 seen in B cells (Fig. 2B). Between fibroblasts, blood, and brain cells, there were 89  
145 shared VMRs (Fig. 2B). In addition, methylation levels at CpGs within shared VMRs  
146 were highly correlated across cell types within tissues, suggesting that observed  
147 population variation is plausibly established in precursors of these cell types and  
148 maintained, or influenced by common factors and regulatory mechanisms. For example,  
149 shared VMRs between T cells and B cells had a mean correlation coefficient of  $r=0.77$   
150 (Supplementary Fig. S1). Likewise for neurons and glia, shared VMR-CpGs were highly  
151 correlated (mean  $r=0.83$ , Supplementary Figs. S1). However, the same degree of  
152 correlation was not observed for comparisons between fibroblasts and T cells (mean  
153  $r=0.57$ ) or B cells (mean  $r=0.42$ , Supplementary Fig. S1).



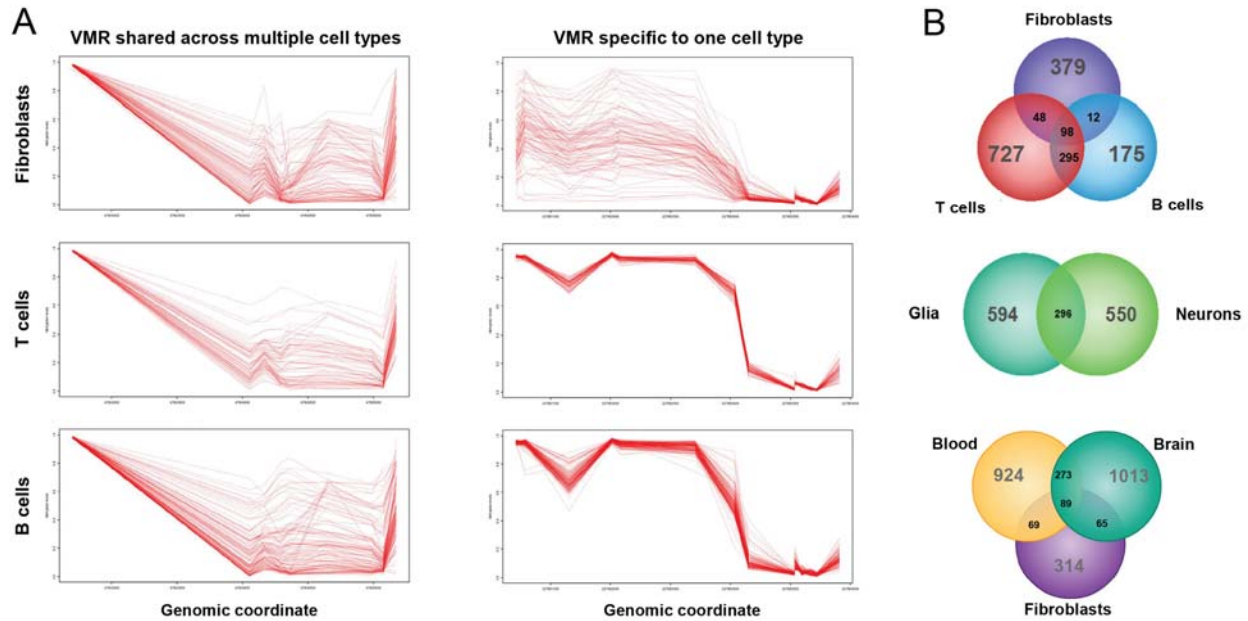

154

155 **Figure 2. Epigenetic variation in different cell types. (A)** While some VMRs are common to multiple  
156 different cell types, in contrast, other VMRs identified in one cell type show minimal epigenetic variation in  
157 other tissues. **(B)** Venn diagram showing the degree of overlap for VMRs found in B-cells, T-cells,  
158 Fibroblasts, Neurons and Glia.

159

### 160 ***Replication of shared VMRs in a larger cohort***

161

162 Before extending our analysis of VMRs, we first replicated our method and results in a  
163 larger population. We applied our sliding window approach for identifying VMRs to a  
164 cohort of 2,680 individuals sampled from the general population (Lehne et al., 2015),  
165 identifying 1,312 VMRs. Because this dataset contained methylation profiles generated  
166 from peripheral blood, rather than purified cell types, we compared VMRs identified in  
167 these controls with shared VMRs that were identified in both B cells and T cells in the  
168 Gencord cohort: 339 were also found in the replication cohort, yielding a 32-fold  
169 enrichment over that expected by chance ( $p < 2.5 \times 10^{-321}$ ).

170

171 ***VMRs preferentially overlap specific gene/CpG island features and functional***  
172 ***elements in the human genome***

173

174 Differentially methylated CpGs have been shown to often be enriched in specific regions  
175 of the genome and to co-localize with other functional epigenetic signatures (Cedar and  
176 Bergman, 2009; Deaton and Bird, 2011; Jones, 2012). In order to gain insight into the  
177 genomic context of CpGs in VMRs, we tested the enrichment of these CpGs in relation  
178 to various genomic features compared to a background set of CpGs assayed on the  
179 array.

180 We first performed enrichment analysis using Refseq gene and CpG island (CGI)  
181 annotations, observing consistent trends across datasets (Supplementary Table S2).  
182 Specifically, we noted that in all five of the cell types tested, VMRs were significantly  
183 enriched in 3' UTRs and depleted in 5' UTRs (enrichments ranging from 1.32- to 1.73-  
184 fold across the different cell types,  $p=1.4 \times 10^{-6}$  to  $p=8.3 \times 10^{-18}$ ). Likewise, the depletion of  
185 VMRs within 5' UTRs ranged from 1.36- to 1.78-fold ( $p=1.3 \times 10^{-10}$  to  $p=4.0 \times 10^{-21}$ )  
186 (Supplementary Table S2). The depletion in 5' UTRs was also reflected in enrichment  
187 tests conducted using CGI annotations, which revealed significant depletions in CGIs  
188 and concomitant enrichments in CpG shores, shelves, and sea categories  
189 (Supplementary Table S2).

190 To further explore the co-localization of VMRs with functional genomic regions,  
191 we assessed the overlap of FVMRs and BVMRs with Chromatin State Segmentation  
192 annotations from a normal human lung fibroblast (NHLF) cell line and an EBV-

193 immortalized lymphoblastoid cell line (GM12878), respectively; these data were  
194 previously generated by the ENCODE project (Ernst and Kellis, 2010), and included  
195 genome-wide annotations for 15 chromatin states characterized using combined  
196 epigenetic signatures from various datasets. Consistent with observed depletions in  
197 gene 5' UTRs and CpG islands, which both tend to occur within or adjacent to gene  
198 promoters and transcriptional start sites, we also noted significant depletions of both  
199 FVMRs and BVMRs in regions defined by "Active Promoter" chromatin states in  
200 respective cell types (Supplementary Table S2). The strongest VMR enrichments in  
201 both cell types occurred in chromatin states associated with enhancer activity  
202 (Supplementary Table S2).

203

204 ***VMRs form both cis and trans co-methylated networks that are enriched for***  
205 ***genes and transcription factor binding sites with cell-type relevant functions***

206

207 We next sought to investigate the positional relationships of co-regulated VMRs. In each  
208 cell type we constructed pair-wise correlation matrices of all VMRs based on the  $\beta$ -  
209 values of the probe with the highest population variance within each VMR. The resulting  
210 heat maps of pairwise correlations revealed the presence of strongly co-methylated  
211 blocks of CpGs, whose methylation levels varied together in both *cis* and *trans*, and that  
212 these patterns were distinct to each cell type (Fig. 3; Supplementary Fig. S2). For  
213 example, as shown in Fig. 3A, FVMRs exhibit strong *cis* correlations within several  
214 chromosomal regions. Significantly, evidence of strong co-regulation *in trans* can also  
215 be seen, with several regions located on multiple different chromosomes also exhibiting

216 strong co-variation in epigenetic state. Visual inspection of the strongest *trans*  
 217 correlations in fibroblasts located on chromosomes 2, 7, 12 and 17 showed that each of  
 218 these co-regulated clusters of VMRs corresponded to different members of the *HOX*  
 219 gene superfamily, suggesting that such VMRs might correspond to coordinately  
 220 regulated loci with shared biological functions.

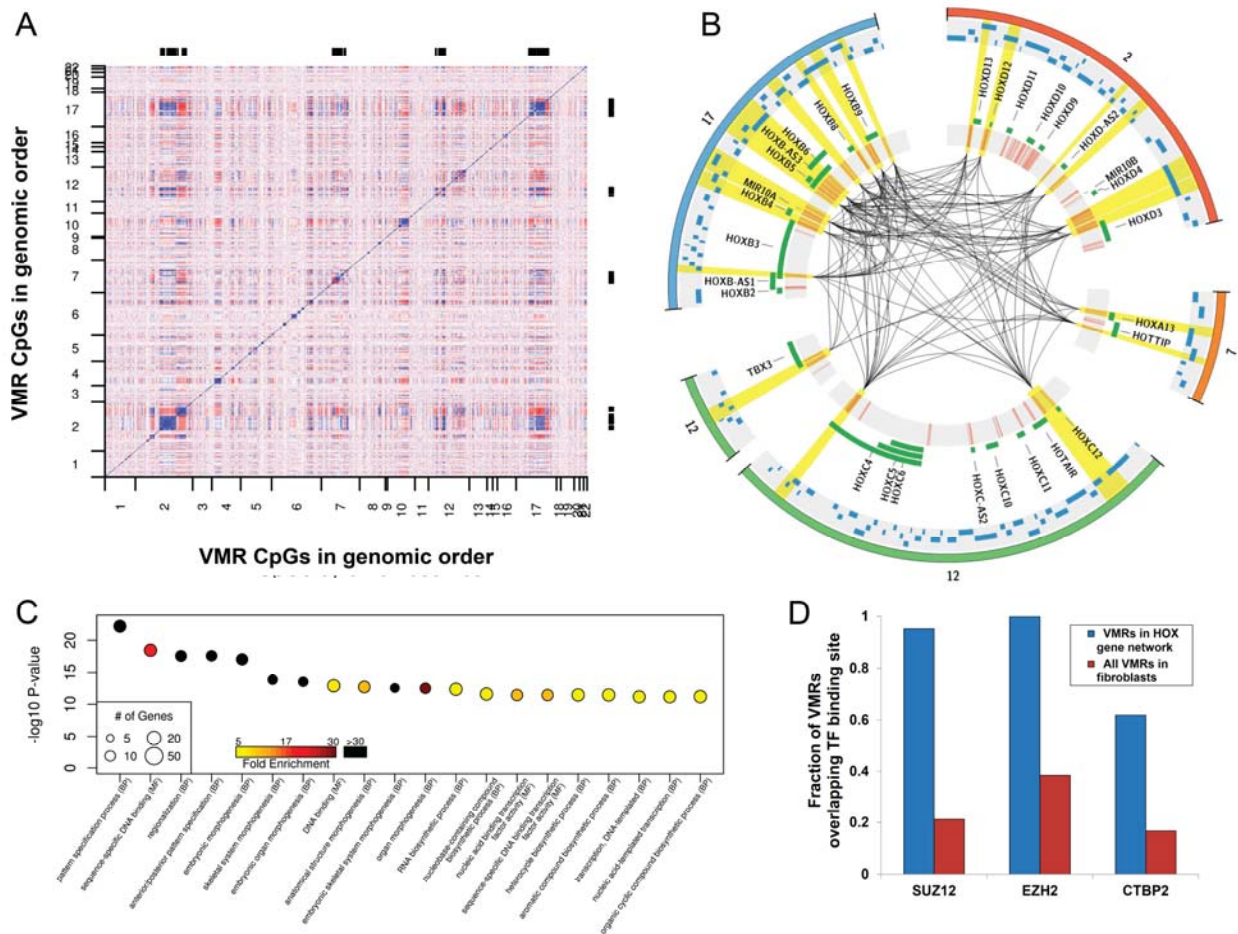

221  
 222 **Figure 3. Cis and trans co-regulation of VMRs located at functionally related networks of genes**  
 223 **that govern key developmental pathways. (A)** Heat map of pair wise correlation values between all  
 224 CpGs located within VMRs defined in fibroblasts. CpGs on both axes are ordered by genomic position,  
 225 revealing the presence of multiple loci located on different chromosomes that show highly correlated  
 226 methylation levels in *trans*. **(B)** After selecting one CpG per VMR with the highest variance, we applied  
 227 WCGNA to identify networks of significantly co-regulated VMRs. The Circos plot shows a representation

228 of the largest co-regulated VMR module identified in fibroblasts, which comprises 21 independent VMRs  
229 located on four different chromosomes, comprising all four clusters of *HOX* genes, in addition to another  
230 developmental regulator *TBX3* (*outer circle*). CpGs within VMRs in the co-regulated module are  
231 represented by red tick marks (*inner grey circle*), with black lines joining VMRs that have methylation  
232 levels with pair wise absolute correlation values  $R \geq 0.7$  (*highlighted in yellow*). Green bars show locations  
233 of genes at each locus. Blue bars show the location of transcription factor binding sites for SUZ12, EZH2  
234 and CTBP2, all of which are significantly enriched within this co-regulated module. **(C)** Results of Gene  
235 Ontology (GO) analysis of genes associated with VMRs in the most significant co-regulated module  
236 identified in fibroblasts. We identified highly significant enrichments for multiple biological processes,  
237 including body patterning, growth and morphogenesis (Supplementary Table S5). **(D)** Analysis of  
238 transcription factor binding sites defined using ChIP-seq (ENCODE Consortium, 2013) showed that VMRs  
239 within the co-regulated *HOX* gene module are significantly enriched for SUZ12, EZH2 and CTBP2 binding  
240 compared to all VMRs defined in fibroblasts (Bonferroni corrected  $p=3.8 \times 10^{-10}$ ,  $p=6.0 \times 10^{-7}$  and  $p=1.3 \times 10^{-3}$ ,  
241 respectively). Thus, binding of these TFs represents a potential mechanism by which epigenetic  
242 variation could be coordinated at multiple independent loci in *trans*.

243  
244 Based on this observation, we sought to formally identify signatures of co-  
245 regulation among different VMRs. We used weighted gene co-expression network  
246 analysis (WGCNA; see Methods)(Zhang and Horvath, 2005; Langfelder and Horvath,  
247 2008), to identify co-methylated networks of VMRs within each cell type. This identified  
248 six co-regulated modules in fibroblasts, four in T cells, two in B cells, six in neurons, and  
249 two in glia, with each module composed of between 12 and 425 distinct co-regulated  
250 VMRs (median module size,  $n=39$ ) (Supplementary Table S3, Supplementary Fig. S3).  
251 Consistent with our initial visual observations, WGCNA identified several co-regulated  
252 modules within the set of fibroblast VMRs that included all four human *HOX* gene  
253 clusters (Fig. 3B).

254 In order to assess the biological relevance of these co-regulated VMR networks,  
255 we performed Gene Ontology (GO) enrichment analysis on the set of genes linked to  
256 the VMRs within each module (Supplementary Tables S4 and S5, Supplementary Fig.  
257 S4). Although for many networks the number of associated genes was too small to  
258 reach significance at 10% FDR, in four of the five cell types tested we identified  
259 enrichments for GO terms that were of direct functional relevance to the specific cell  
260 type. The five most significant GO enrichments and associated modules for each cell  
261 type are presented in Table 1. For example, in fibroblasts, the most significant functional  
262 categories were within the brown module that included multiple *HOX* gene clusters,  
263 including terms associated with the basic control of tissue growth and morphogenesis,  
264 such as “anterior/posterior pattern specification” (GO:0009952; 82-fold enrichment, FDR  
265  $q=3.3 \times 10^{-16}$ ) and “embryonic morphogenesis” (GO:0048598; 34-fold enrichment, FDR  
266  $q=8.9 \times 10^{-16}$ ). In T cells, the most significant GO enrichments were found for the blue  
267 module, made up of 72 co-regulated VMRs enriched for genes involved in T cell  
268 function, including the terms “T cell aggregation” (GO:0070489; 15-fold enrichment,  
269 FDR  $q=2.9 \times 10^{-6}$ ) and “T cell receptor signaling pathway” (GO:0050852; 15-fold  
270 enrichment, FDR  $q=7.4 \times 10^{-5}$ ). In glial cells, significantly enriched terms included a  
271 module consisting of 425 VMRs linked to genes associated with “negative regulation of  
272 neurogenesis” (GO:0050768; 4.6-fold enrichment, FDR  $q=1.2 \times 10^{-5}$ ). Finally, in neurons,  
273 the most strongly associated functional categories were with a module comprised of 112  
274 VMRs including the GO term “negative regulation of synaptic transmission”  
275 (GO:0050805; 13-fold enrichment, FDR  $q=0.09$ ). Complete lists of enriched GO terms  
276 and modules are provided in Supplementary Table S5.



277 **Table 1. The top three Gene Ontology terms associated with co-regulated VMR**  
278 **modules found in each cell type**

| Cell Type          | GO Term ID | Gene Ontology (GO) Term                                      | Enrichment | FDR      |
|--------------------|------------|--------------------------------------------------------------|------------|----------|
| <b>Fibroblasts</b> | GO:0007389 | Pattern specification process                                | 42.7       | 3.07E-20 |
|                    | GO:0009952 | Anterior/posterior pattern specification                     | 81.8       | 3.32E-16 |
|                    | GO:0003002 | Regionalization                                              | 54.2       | 3.32E-16 |
| <b>T Cells</b>     | GO:0007159 | Leukocyte cell-cell adhesion                                 | 14.2       | 2.94E-06 |
|                    | GO:0042110 | T cell activation                                            | 15.3       | 2.94E-06 |
|                    | GO:0070489 | T cell aggregation                                           | 15.3       | 2.94E-06 |
| <b>B Cells</b>     | GO:0002761 | Regulation of myeloid leukocyte differentiation              | 11.8       | 0.1496   |
|                    | GO:1902105 | Regulation of leukocyte differentiation                      | 7.2        | 0.1658   |
|                    | GO:0070233 | Negative regulation of T cell apoptotic process              | 50.0       | 0.1658   |
| <b>Glia</b>        | GO:0050768 | Negative regulation of neurogenesis                          | 4.6        | 1.18E-05 |
|                    | GO:0051961 | Negative regulation of nervous system development            | 4.2        | 3.33E-05 |
|                    | GO:0045665 | Negative regulation of neuron differentiation                | 4.6        | 0.0002   |
| <b>Neuron</b>      | GO:0007611 | Learning or memory                                           | 6.2        | 0.0905   |
|                    | GO:0050805 | Negative regulation of synaptic transmission                 | 13.2       | 0.0905   |
|                    | GO:1901019 | Regulation of calcium ion transmembrane transporter activity | 13.0       | 0.0905   |

279

280 Based on the *trans* nature of these co-regulated VMR networks, we hypothesized  
281 that coordinated epigenetic regulation of these sites might be based on the binding of  
282 specific *trans*-acting factors to the members of each VMR network. We therefore  
283 analyzed the overlap of each VMR WGCNA module with validated transcription factor  
284 binding sites (TFBS) for 161 different transcription factors (TFs) studied by the  
285 ENCODE project (ENCODE Consortium, 2013). We observed significant enrichments  
286 for TFBS in several VMR modules that were specific to each cell type (Supplementary  
287 Table S6). The top three enriched TFBS per cell type are provided in Table 2. In several  
288 instances, the most significant TFBS enrichments converged on modules highlighted by  
289 GO analyses. For example, EBF1 and RUNX3, which are both involved in lymphocyte  
290 differentiation and proliferation (Heltemes-Harris and Farrar, 2012), were the most

291 significantly enriched TFs in the blue module in T cells (RUNX3, 2.4-fold enrichment,  
 292  $p=5.3 \times 10^{-8}$ ; EBF1, 2.6 fold enrichment,  $p=7 \times 10^{-8}$ ). Similarly, in fibroblasts, TFBS for  
 293 SUZ12 (3.5-fold enrichment, Fisher's.  $p=3.4 \times 10^{-10}$ ) and EZH2 (2.4-fold enrichment,  
 294  $p=8.0 \times 10^{-9}$ ), were the most significantly enriched among VMRs of the module that  
 295 included multiple *HOX*-genes (Fig. 3D). Prior studies have shown that as part of the  
 296 polycomb complex, SUZ12 and EZH2 have roles in the establishment of epigenetic  
 297 modifications, and specifically in the regulation of *HOX* genes (Cao et al, 2008).

298

299 **Table 2. Top 5 Transcription Factor Binding Sites overlapping with VMRs in**  
 300 **various WGCNA modules in 5 cell types**

| Cell type          | TFBS    | # VMRs overlapping TFBS | # VMRs in Module | Enrichment | P value  |
|--------------------|---------|-------------------------|------------------|------------|----------|
| <b>Fibroblasts</b> | SUZ12   | 19                      | 21               | 3.5        | 3.42E-10 |
|                    | EZH2    | 21                      | 21               | 2.37       | 8.03E-09 |
|                    | CTBP2   | 11                      | 21               | 2.76       | 0.0005   |
|                    | TCF7L2  | 9                       | 21               | 1.97       | 0.0224   |
|                    | HMG3    | 6                       | 21               | 2.47       | 0.0250   |
| <b>T cells</b>     | RUNX3   | 33                      | 72               | 2.43       | 5.26E-08 |
|                    | EBF1    | 30                      | 72               | 2.59       | 7.04E-08 |
|                    | CEBPB   | 33                      | 72               | 2.22       | 5.74E-07 |
|                    | WRNIP1  | 17                      | 72               | 3.73       | 6.07E-07 |
|                    | NFIC    | 23                      | 72               | 2.87       | 6.71E-07 |
| <b>B cells</b>     | RELA    | 13                      | 15               | 5.52       | 1.30E-09 |
|                    | STAT1   | 8                       | 15               | 6.58       | 4.31E-06 |
|                    | POU2F2  | 9                       | 15               | 4.7        | 1.50E-05 |
|                    | EBF1    | 10                      | 15               | 3.95       | 1.80E-05 |
|                    | IKZF1   | 5                       | 15               | 11.37      | 2.90E-05 |
| <b>Glia</b>        | ESR1    | 30                      | 425              | 1.46       | 0.0024   |
|                    | GATA2   | 75                      | 425              | 1.24       | 0.0039   |
|                    | EP300   | 122                     | 425              | 1.17       | 0.0042   |
|                    | FOXA2   | 43                      | 425              | 1.29       | 0.0118   |
|                    | SMARCC1 | 22                      | 425              | 1.44       | 0.0121   |
|                    | EZH2    | 13                      | 13               | 7.05       | 5.26E-12 |
|                    | SUZ12   | 7                       | 13               | 13.02      | 1.61E-07 |



|               |       |    |     |      |          |
|---------------|-------|----|-----|------|----------|
| <b>Neuron</b> | CTBP2 | 6  | 13  | 8.31 | 2.73E-05 |
|               | EP300 | 36 | 112 | 1.8  | 5.47E-05 |
|               | JUN   | 21 | 112 | 2.3  | 7.24E-05 |

301

302

303 ***Methylation levels at VMRs are influenced by both heritable and non-heritable***  
304 ***factors***

305

306 Motivated by the signatures of co-methylation observed in our VMRs, we next sought to  
307 broadly explore the potential underlying factors associated with the regulation of VMR  
308 methylation variability. To do this, we first assessed the relationships between CpGs  
309 within VMRs, genetic variation, and gene expression. We tested for enrichment of  
310 FVMRs, BVMRs and TVMRs with previously described CpG methylation:gene  
311 expression associations (eQTM) and CpG methylation:SNP associations (*cis* mQTLs)  
312 in fibroblasts, B cells and T cells (Gutierrez-Arcelus et al., 2013). We observed  
313 significant enrichments for VMRs in all three cell types for both CpGs that function as  
314 eQTM and those linked with mQTLs, with enrichments of 18.8-, 3.2-, and 3.6-fold in  
315 eQTM, and 4.4-, 6.5-, and 5.1-fold for association with mQTLs in FVMRs, BVMRs, and  
316 TVMRs, respectively (all p-values  $<10^{-53}$ , Supplementary Table S2). Similarly, 174  
317 (32.4%) of FVMRs, 796 (68.1%) of TVMRs and 343 (59.1%) of BVMRs overlapped with  
318 mQTLs defined in prior analyses (Gutierrez-Arcelus et al., 2013). To further investigate  
319 the relationship of VMRs with underlying genetic variation we used methylation  
320 heritability estimates characterized in peripheral blood leukocytes from a cohort of 117  
321 families (McRae et al., 2014). Overlaying heritability estimates onto VMR-CpGs across  
322 the five cell types revealed that methylation levels for CpGs within VMRs showed

323 significantly increased heritability compared to non-VMR CpGs (Fig. 4A). Thus,  
324 epigenetic variation at VMRs is often associated with nearby gene expression, and  
325 methylation levels at many VMRs shows strong evidence of being under local genetic  
326 control.

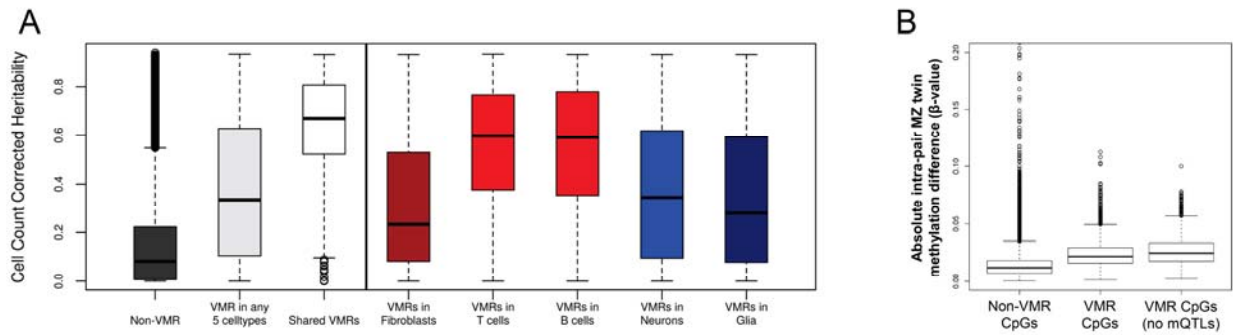

327  
328 **Figure 4. Methylation levels at VMRs are influenced by heritable and non-heritable factors. (A)** Cell  
329 count corrected heritability (Grundberg et al., 2013) for VMRs in five cell types. VMRs found in >1 cell  
330 type show significantly higher heritability, suggesting these are mostly under genetic control **(B)**  
331 Methylation differences found within 13 pairs of monozygotic twins. CpGs that lie within VMRs show  
332 significantly increased MZ twin divergence compared to other CpGs, suggesting an environmental  
333 influence on methylation levels at VMRs. This effect is even more pronounced after excluding those  
334 VMRs known to be under genetic control.

335  
336 However, despite this evidence for genetic influences underlying a large fraction  
337 of epigenetic variability, the existence of co-regulated modules of VMRs *in trans* led us  
338 to hypothesize that a subset of epigenetic variation might be linked to non-genetic  
339 influences, such as differing environmental exposures. To further explore the influence  
340 of non-heritable factors on the epigenetic state of VMRs, we analyzed methylation  
341 profiles from 13 monozygotic (MZ) twin pairs (McRae et al., 2014). Previous studies  
342 have shown increased discordance of DNA methylation levels between MZ twins with

343 age, presumably due to differing environmental exposures and/or stochastic processes  
344 (Fraga et al., 2005). We first identified a total of 1,411 VMRs (9,079 CpGs) in these  
345 twins (Supplementary Table S7). Based on the premise that epigenetic differences  
346 between MZ twin pairs provides a measure of the non-genetic component of epigenetic  
347 variability, at each CpG we calculated the mean absolute methylation discordance for all  
348 autosomal CpGs within each MZ twin pair. We observed a highly significant increase in  
349 MZ twin discordance for CpGs within VMRs versus non-VMR CpGs ( $p < 10^{-300}$ ) (Fig. 4B).  
350 Furthermore, after removing those CpGs known to be associated with mQTLs, *i.e.* those  
351 under genetic control, the degree of MZ twin discordance in the remaining VMRs  
352 increased substantially (Fig. 4B). These observations provide strong support for the  
353 influence of environmental effects on methylation variability at a subset of VMRs.

354

355 ***Experimental evidence for environmental influences on DNA methylation from a***  
356 ***cell culture model***

357

358 To experimentally verify whether methylation levels at some VMRs are responsive to  
359 environmental cues, we performed cell culture experiments in which we grew  
360 genetically identical fibroblasts under different environmental conditions, varying levels  
361 of nutrient deprivation and cell density with time (Fig. 5A). Skin fibroblasts from a single  
362 normal male (GM05420) were seeded in parallel from a single master culture into eight  
363 separate flasks, and allowed to grow under normal or low-nutrient conditions, achieving  
364 varying levels of cell density at each time point. Every 48 hours one flask was harvested

365 from each nutrient regime, DNA extracted and profiled on the 450k array, resulting in  
366 DNA methylation profiles for nine samples (see Methods).

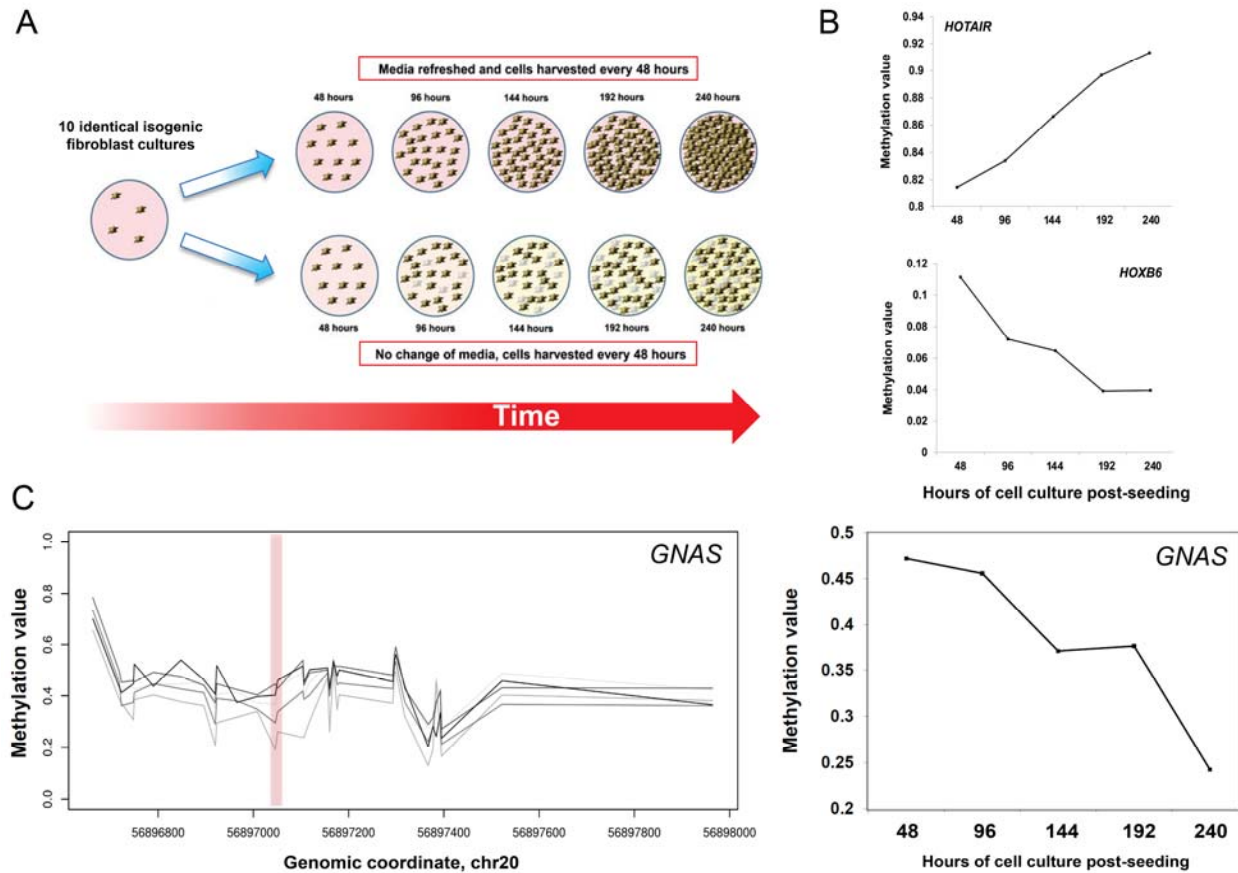

367  
368 **Figure 5. Experimental manipulation of DNA methylation using cell culture shows enrichment for**  
369 **VMRs at *HOX* genes and imprinted loci. (A)** To directly assess the effect of varying environmental  
370 conditions on epigenetic state, we grew genetically-identical fibroblasts under conditions of increasing cell  
371 density and nutrient deprivation. Cells from a single human fibroblast line were seeded in parallel at low  
372 density in ten culture flasks, and allowed to grow continuously for up to 10 days, either with or without  
373 regular change of media. Every 48 hours one flask was harvested and genome-wide DNA methylation  
374 patterns profiled. **(B)** Applying a sliding window approach identified 142 VMRs where methylation levels  
375 showed robust changes with varying culture conditions, including loci at several *HOX* genes and multiple  
376 imprinted loci. Gene ontology analysis of VMRs induced by cell culture showed enrichments for  
377 fundamental control of growth, including similar GO categories to the co-methylated network identified in  
378 fibroblasts from the Gencord cohort (data not shown). **(C)** Environmentally-responsive VMRs induced by

379 cell culture showed a 47-fold enrichment for probes within the differentially methylated regions associated  
380 with nine different imprinted genes ( $p=1.5 \times 10^{-94}$ ). The left plot shows methylation profiles at the imprinted  
381 region of *GNAS*, which was also identified as a VMR in cultured fibroblasts. Each line shows the  
382 methylation profile at a different time point, with lighter shades of grey with increasing time. The right plot  
383 shows the change in methylation level with time at a single CpG (cg22407822) within the *GNAS* VMR.  
384

385 We applied the same sliding-window method to identify VMRs in these cultured  
386 isogenic fibroblasts, identifying 162 putatively “environmentally responsive” VMRs. This  
387 included many of the same VMRs identified previously in our population-based analysis  
388 of umbilical cord-derived fibroblasts (Supplementary Table S8), with a 7.3-fold  
389 enrichment for overlap between these two sets of VMRs ( $p=1.4 \times 10^{-47}$ ). Examples of  
390 VMRs showing changes in methylation level with culture conditions are shown in Fig.  
391 5B.

392 Concordant with our population analysis, GO analysis of the 162 VMRs from  
393 cultured isogenic fibroblasts revealed enrichments for *HOX* genes, as well as the  
394 several of the same GO terms associated with the co-regulated FVMR modules  
395 (Supplementary Table S9). Strikingly, these environmentally responsive VMRs were  
396 also enriched 47-fold for CpGs within known imprinted loci versus the null ( $P=1.5 \times 10^{-94}$ ).  
397 This included overlaps with differentially methylated regions associated with the  
398 imprinted genes *PPIEL*, *MKRN3*, *MAGEL2*, *SNRPN*, *PEG3*, *L3MBTL1*, *MEST*,  
399 *PLAGL1*, and *GNAS* (Fig. 5C) (Court et al., 2014).

400

401

402

## 403 **DISCUSSION**

404 Here we surveyed variation in DNA methylation patterns in five purified human cell  
405 types, identifying hundreds of genomic loci that exhibit a high degree of epigenetic  
406 polymorphism in the human population: we term these ‘Variably Methylated Regions’ or  
407 VMRs. We observed that VMRs are enriched for various functional genomic features,  
408 most notably enhancers, suggesting a potential role in regulating gene expression  
409 patterns. Unexpectedly, we found that many VMRs form co-regulated networks both *in*  
410 *cis* and *in trans*, with multiple VMRs spread across different chromosomes at which  
411 methylation levels vary in a coordinated fashion. These co-regulated networks were  
412 specific to each cell type, had reduced heritability, and were also enriched for gene sets  
413 with cell-type relevant functions. For example, we observed VMR networks associated  
414 with genes enriched for learning/memory and synaptic transmission in neurons,  
415 regulation of nervous system development in glia, and T cell activation in T cells. These  
416 observations suggest that some VMRs represent loci that form co-regulated pathways  
417 that are implicated in the regulation of genes with cell-type specific functions. The  
418 dispersed nature of these co-regulated VMR networks indicates that they are potentially  
419 regulated by *trans* acting factors, and consistent with this we found significant  
420 enrichments for relevant transcription factor binding sites associated with some  
421 networks.

422 While many VMRs are influenced by local genotypes, our analyses of  
423 monozygotic twins and *in-vitro* culture of genetically identical fibroblasts cell lines clearly  
424 demonstrates that epigenetic variation at some VMRs is linked to environmental factors.  
425 Indeed, using isogenic fibroblast cultures derived from a single individual that were

426 grown under different environmental conditions, we were able to replicate many of the  
427 same VMRs found in our original population analysis, thus showing definitively that  
428 epigenetic variation at these loci is an environmentally inducible trait. Intriguingly these  
429 environmentally-responsive VMRs showed a strong enrichment for imprinted loci ( $p < 10^{-94}$ ),  
430 suggesting that these genes are particularly sensitive to environmental conditions.  
431 This observation that varying cell culture conditions result in epigenetic alterations  
432 across the genome, presumably accompanied by changes in gene expression,  
433 highlights that the use of cultured cells for investigating epigenetic phenomena should  
434 be approached with caution. We suggest that unless carefully controlled, variations in  
435 cell culture conditions could easily introduce significant epigenetic and transcriptional  
436 changes that could confound many *in vitro* studies.

437 VMRs in fibroblasts comprised co-regulated modules that included all four *HOX*  
438 gene clusters that are each located on different chromosomes. Using validated  
439 transcription factor binding sites, we found a significant enrichment for transcription  
440 factors EZH2 and SUZ12 at these VMR sites associated with *HOX* genes. These two  
441 transcription factors are components of the Polycomb Repressive Complex 2 (PRC2),  
442 which functions as a histone H3K27-specific methyltransferase and regulates both  
443 epigenetics and expression of *HOX* genes (Cao et al., 2008). Thus, we propose a  
444 model where coordinated variation of DNA methylation at multiple loci in *trans*,  
445 corresponding to a network of co-regulated genes, is under the control of transcription  
446 factor binding in response to physiological and/or environmental cues. In the case of the  
447 *HOX* gene network in cultured fibroblast cell lines, such cues could be the availability of  
448 nutrients, local cell density and other growth conditions, allowing the cells to modify their

449 growth trajectories in response to the prevailing environment. Consistent with this  
450 model, recent observations were made in macrophages, a type of immune cell that has  
451 a variety of roles in different tissues around the body, which mirror our findings. Two  
452 prior studies showed that the epigenetic state of enhancer elements in these cells  
453 responds to the tissue microenvironment in which they reside, and is regulated by  
454 networks of tissue- and lineage-specific transcription factors that drive divergent  
455 programs of gene expression (Gosselin et al., 2014; Lavin et al., 2014). Studies of  
456 chromatin accessibility have also shown that manipulating the presence of specific  
457 transcription factors can lead to global modification of epigenetic state at multiple loci *in*  
458 *trans* (Buenrostro et al., 2015).

459         One of the strengths of this study is that we specifically utilized purified cell types  
460 for our analysis, some of which were also of homogeneous age. This has the advantage  
461 of removing the confounder of both cellular heterogeneity and age effects, both of which  
462 are known to influence DNA methylation (Christensen et al. 2009; Day et al., 2013;  
463 Houseman et al., 2015). Such differences would otherwise result in many false positive  
464 VMRs due to underlying differences in cell fractions or age among individuals.  
465 Furthermore, we also utilized a window-based approach for defining VMRs. This  
466 requirement for the presence of multiple neighboring CpGs with high population  
467 variance means our results should be robust to potential effects of underlying sequence  
468 variants, which can artifactually influence reported methylation levels at single probes.

469         One of the limitations of this analysis is that we used methylation profiles from  
470 the Illumina 450k array, which targets only a small subset (~3%) of CpGs in the human  
471 genome, and has coverage that is biased towards gene promoters and CpG islands. As



472 such, the maps of VMRs we provide here are far from comprehensive, and future work  
473 that utilizes more comprehensive approaches (e.g. whole genome bisulfite sequencing)  
474 will undoubtedly provide more complete genomic maps of epigenetic variation.  
475 However, to our knowledge currently no such datasets on a population-scale are  
476 available. One other potential caveat is that the methylation profiles for B cells,  
477 fibroblasts and T cells were all generated from cells that had been cultured *in vitro*, and  
478 furthermore the B cells were also immortalized by Epstein-Barr virus infection, a  
479 process which is known to induce widespread epigenetic changes (Grafodatskaya et al.,  
480 2010). However, we observed good replication of the VMRs identified from  
481 cultured/immortalized B cells and T cells in an independent cohort where DNA was  
482 extracted from uncultured blood, indicating that many of these same VMRs observed  
483 even in immortalized B cells are also present natively.

484 In conclusion our study of DNA methylation polymorphism provides novel  
485 insights into the nature and function of epigenetic variation. The coordinated response  
486 we observed where methylation levels at networks of multiple genomic regions varies in  
487 response to the local environment is consistent with popular theories that the  
488 epigenome can indeed act as an interface between the genome and environment (Liu et  
489 al., 2008; Tammen et al., 2013, Bell and Beck, 2010).

490

491 **METHODS**

492 ***Data processing and statistical analysis***

493 We obtained DNA methylation data generated using the Illumina 450k  
494 HumanMethylation BeadChip from two published studies. We utilized data from the  
495 Gencord cohort from the EMBL-EBI European Genome-Phenome Archive  
496 (<https://www.ebi.ac.uk/ega/>) under accession number EGAS00001000446, representing  
497 107 fibroblast cultures, 66 T-cell cultures and 111 immortalized B-cell cultures derived  
498 from a cohort of newborns (Gutierrez-Arcelus et al., 2013). We also utilized methylation  
499 data representing FAC-sorted glial and neuronal cells from 58 deceased donors  
500 downloaded from GEO (<http://www.ncbi.nlm.nih.gov/geo/>) under accession number  
501 GSE41826 (Guintivano et al., 2013). Prior to analysis for methylation variation, each  
502 dataset underwent several filtering and normalization steps, as follows. In each  
503 individual, probes with a detection  $p > 0.01$  (mean  $n = 348$  per sample) or mapping to the X  
504 or Y chromosomes were removed. 482,421 probe sequences (50-mer oligonucleotides)  
505 were remapped to the reference human genome hg18 (NCBI36) using BSMAP,  
506 allowing up to 2 mismatches and 3 gaps, retaining those 470,681 autosomal probes  
507 with unique genomic matches. Probe coordinates were converted to hg19 using *liftOver*.  
508 Probes that overlapped SNPs identified by the 1000 Genomes Project (minor allele  
509 frequency  $\geq 0.05$ ) either including or within 5bp upstream of the targeted CpG ( $n = 9,409$   
510 autosomal probes) were discarded, as such variants can introduce biases in probe  
511 performance. We also removed probes overlapping copy number variants of  $\geq 5\%$   
512 frequency in CEU HapMap samples (Conrad et al., 2010). One pair of neuronal/glial  
513 samples was excluded on the basis that they showed discrepant gender, as determined

514 by PCA analysis of  $\beta$ -values on the sex chromosomes. For sliding window analysis, we  
515 sub-selected 316,452 autosomal 1kb windows containing 3 or more probes. CpGs  
516 targeted by these probes were then annotated based on their position relative to  
517 RefSeq genes using BEDTools v2.17.

518

### 519 ***Variably Methylated Regions***

520 To identify regions of common highly variable methylation that should be robust to  
521 fluctuations in single probes, we chose an approach to identify loci containing multiple  
522 independent probes showing high population variance. For each probe, we calculated  
523 the standard deviation (SD) of the  $\beta$ -value across all individuals in each cell type. We  
524 then utilized a 1kb sliding window based on the start coordinate of each probe,  
525 beginning at the most proximal probe on each chromosome and moving down  
526 consecutively to the last probe on each chromosome. We defined VMRs as those 1kb  
527 regions containing at least 3 probes  $\geq 95^{\text{th}}$  percentile of SD in that cell type, with an  
528 additional criterion that at least 50% of the probes in that window were also  $\geq 95^{\text{th}}$   
529 percentile of SD.

530

### 531 ***Network Analysis and Gene Ontology Analysis***

532 To identify potential co-regulation relationships among VMRs, we applied Weighted  
533 Gene Correlation Network Analysis (WGCNA) to each set of VMRs identified per cell  
534 type (Langfelder and Horvath, 2008). Input values for each VMR were first reduced to a  
535 single data point per individual by averaging  $\beta$ -values for the multiple probes within each  
536 VMR. We generated adjacency matrices by raising the correlation matrix to the power of

537 6, which was then transformed into topological overlap matrix (TOM). VMRs were then  
538 classified into modules using hybrid dynamic tree cutting with a minimum cluster size of  
539 10 probes. VMRs in each module were selected at Module Membership value  $\geq 0.7$ . We  
540 associated VMRs with gene annotations based on either their localization within  $\pm 2$ kb of  
541 Refseq transcription start sites, overlap with DNaseI hypersensitive sites that showed  
542 significant association *in cis* with gene expression levels within ENCODE cell lines  
543 (Sheffield et al., 2013), and significant associations between methylation and gene  
544 expression levels (eQTM) in T cells, B cells, fibroblasts (Gutierrez-Arcelus et al., 2013).  
545 For each module with at least 10 associated genes, we performed Gene Ontology  
546 enrichment analysis using GOrilla (<http://cbl-gorilla.cs.technion.ac.il/>)(Eden et al., 2009).

547

#### 548 ***Enrichment analysis of transcription factor binding sites***

549 We downloaded the track of Uniform transcription factor binding sites (TFBS) from the  
550 UCSC Genome browser, containing experimentally determined binding sites for 162  
551 transcription factors. As the precise boundaries of some VMRs were not well defined,  
552 we extended TFBS coordinates by  $\pm 500$ bp prior to overlap with the set of VMRs  
553 identified in each cell type. Enrichment analysis for TFBS to occur within each module  
554 of co-regulated VMRs identified by WCGNA versus the background was performed  
555 using a Fisher's exact test. In each cell type, only TFBSs with  $\geq 10$  overlaps with VMRs  
556 were considered, and we applied a Bonferroni correction to p-values based on the total  
557 number of TFs tested (n=162).

558

#### 559 ***Fibroblast cell culture and methylation profiling***

560 A growing culture of human skin fibroblasts from a normal male individual (GM05420)  
561 was obtained from Coriell Institute for Medical Research (Camden, NJ). Cells were  
562 grown in RPMI1640 media supplemented with 1mM L-glutamine, 10% FBS and 100u/L  
563 each of penicillin and streptomycin. A single vial of fibroblasts was initially grown in a  
564 2ml culture plate, with media changed every 24 hours. Once the cells attained 80%  
565 confluency they were trypsinized and split equally into two T25 flasks. Each flask was  
566 treated identically, with media changed every 24 hours until the cells achieved 80%  
567 confluency (approximately 7 days after seeding). Both cultures were then trypsinized,  
568 mixed, and the cells seeded equally into a total of nine T25 flasks, which were then  
569 harvested at set time points (TP) under different culture regimes, as follows:

570

- 571 1. Harvested immediately
- 572 2. Time Point (TP) 1 - harvested after 48 hours
- 573 3. TP2 - fresh media given at TP1 and then harvested after a further 48 hours
- 574 4. TP3 - fresh media given at TP1 and TP2, and then harvested after a further 48 hours
- 575 5. TP4 - fresh media given at TP1, TP2 and TP3, and then harvested after a further 48  
576 hours
- 577 6. TP5 - fresh media given at TP1, TP2, TP3 and TP4, and then harvested after a  
578 further 48 hours
- 579 7. TP2a – No change of initial media, harvested after 96 hours
- 580 8. TP4a – No change of initial media, harvested after 192 hours
- 581 9. TP5a – No change of initial media and then harvested after 240 hours

582

583 At each time point, cells were harvested by trypsinization, pelleted by centrifugation,  
584 and frozen at -20 Celsius. Once all cultures were harvested, DNA was extracted in a  
585 single batch using the Qiagen DNeasy blood and tissue kit and these samples  
586 processed together on a single chip using the Illumina 450k HumanMethylation  
587 BeadChip according to manufacturer's instructions. The resulting data were then  
588 processed and normalized as described above, and VMRs across these nine samples  
589 defined as 1kb regions containing at least 3 probes  $\geq 95^{\text{th}}$  percentile of SD, with an  
590 additional criterion that at least 50% of the probes in that window were also  $\geq 95^{\text{th}}$   
591 percentile of SD.

592

593

594

595 **DATA ACCESS**

596 Methylation array data from cell line GM05420 have been deposited in the NCBI Gene  
597 Expression Omnibus (GEO) (<http://www.ncbi.nlm.nih.gov/geo>) under accession number  
598 GSE76836.

599

600 **DISCLOSURE DECLARATIONS**

601 The authors declare that they have no competing interests.

602

603

604 **References**

- 605 Abecasis GR, Auton A, Brooks LD, DePristo MA, Durbin RM, Handsaker RE, Kang HM,  
606 Marth GT, McVean GA. 2012. An integrated map of genetic variation from 1,092 human  
607 genomes. *Nature* 491: 56–65.
- 608 Auton A, Brooks LD, Durbin RM, Garrison EP, Kang HM, Korbel JO, Marchini JL,  
609 McCarthy S, McVean GA, Abecasis GR. 2015. A global reference for human genetic  
610 variation. *Nature* 526: 68–74.
- 611 Bell CG, Beck S. 2010. The epigenomic interface between genome and environment in  
612 common complex diseases. *Brief Funct Genomics* 9: 477-85.
- 613 Bell JT, Loomis AK, Butcher LM, Gao F, Zhang B, Hyde CL, Sun J, Wu H, Ward K,  
614 Harris J, et al. 2014. Differential methylation of the TRPA1 promoter in pain sensitivity.  
615 *Nat. Commun.* 5: 2978.
- 616 Benton MC, Johnstone A, Eccles D, Harmon B, Hayes MT, Lea RA, Griffiths L, Hoffman  
617 EP, Stubbs RS, Macartney-Coxson D. 2015. An analysis of DNA methylation in human  
618 adipose tissue reveals differential modification of obesity genes before and after gastric  
619 bypass and weight loss. *Genome Biol.* 16: 8.
- 620 Breitling LP, Yang R, Korn B, Burwinkel B, Brenner H. 2011. Tobacco-smoking-related  
621 differential DNA methylation: 27K discovery and replication. *Am. J. Hum. Genet.* 88:  
622 450–7.
- 623 Buenrostro JD, Wu B, Litzenburger UM, Ruff D, Gonzales ML, Snyder MP, Chang HY,  
624 Greenleaf WJ. 2015. Single-cell chromatin accessibility reveals principles of regulatory  
625 variation. *Nature* 523: 486-90.



626 Busche S, Shao X, Caron M, Kwan T, Allum F, Cheung WA, Ge B, Westfall S, Simon  
627 MM; Multiple Tissue Human Expression Resource, et al. 2015. Population whole-  
628 genome bisulfite sequencing across two tissues highlights the environment as the  
629 principal source of human methylome variation. *Genome Biol.* 16:290.

630 Cao R1, Wang H, He J, Erdjument-Bromage H, Tempst P, Zhang Y. 2008. Role of  
631 hPHF1 in H3K27 methylation and Hox gene silencing. *Mol Cell Biol.* 28: 1862-72.

632 Cedar H, Bergman Y. 2009. Linking DNA methylation and histone modification: patterns  
633 and paradigms. *Nat. Rev. Genet.* 10: 295–304.

634 Christensen BC, Houseman EA, Marsit CJ, Zheng S, Wrensch MR, Wiemels JL, Nelson  
635 HH, Karagas MR, Padbury JF, Bueno R, et al. 2009. Aging and environmental  
636 exposures alter tissue-specific DNA methylation dependent upon CPG island context.  
637 *PLoS Genet.* 5.

638 Conrad DF, Pinto D, Redon R, Feuk L, Gokcumen O, Zhang Y, Aerts J, Andrews TD,  
639 Barnes C, Campbell P, et al. Origins and functional impact of copy number variation in  
640 the human genome. *Nature* 464: 704–12.

641 Cotton M, Price EM, Jones MJ, Balaton BP, Kobor MS, Brown CJ. 2014. Landscape of  
642 DNA methylation on the X chromosome reflects CpG density, functional chromatin state  
643 and X-chromosome inactivation. *Hum. Mol. Genet.* 24: 1528–39.

644 Court F, Tayama C, Romanelli V, Martin-Trujillo A, Iglesias-Platas I, Okamura K,  
645 Sugahara N, Simón C, Moore H, Harness JV, et al. 2014. Genome-wide parent-of-origin  
646 DNA methylation analysis reveals the intricacies of the human imprintome and suggests  
647 a germline methylation independent establishment of imprinting. *Genome Res.* 24(4):  
648 554–69.

649 Davies MN, Krause L, Bell JT, Gao F, Ward KJ, Wu H, Lu H, Liu Y, Tsai PC, Collier DA,  
650 et al. 2014. Hypermethylation in the ZBTB20 gene is associated with major depressive  
651 disorder. *Genome Biol.* 15: R56.

652 Day K, Waite LL, Thalacker-Mercer A, West A, Bamman MM, Brooks JD, Myers RM,  
653 Absher D. 2013. Differential DNA methylation with age displays both common and  
654 dynamic features across human tissues that are influenced by CpG landscape. 2013.  
655 *Genome Biol.* 14: R102.

656 Deaton AM, Bird A. 2011. CpG islands and the regulation of transcription. *Genes Dev.*  
657 25: 1010–22.

658 Dominguez-Salas P, Moore SE, Baker MS, Bergen AW, Cox SE, Dyer RA, Fulford AJ,  
659 Guan Y, Laritsky E, Silver MJ, et al. 2014. Maternal nutrition at conception modulates  
660 DNA methylation of human metastable epialleles. *Nat. Commun.* 5: 3746.

661 Donkin I, Versteyhe S, Ingerslev LR, Qian K, Mechta M, Nordkap L, Mortensen B, Appel  
662 EV, Jørgensen N, Kristiansen VB, et al. 2015. Obesity and Bariatric Surgery Drive  
663 Epigenetic Variation of Spermatozoa in Humans. *Cell Metab.* 2015; 1–10.

664 Eden E, Navon R, Steinfeld I, Lipson D, Yakhini Z. 2009. GOrilla: a tool for discovery  
665 and visualization of enriched GO terms in ranked gene lists. *BMC Bioinformatics* 10: 48.

666 ENCODE Consortium. 2013. An integrated encyclopedia of DNA elements in the human  
667 genome. *Nature* 489: 57–74.

668 Ernst J, Kellis M. 2010. Discovery and characterization of chromatin states for  
669 systematic annotation of the human genome. *Nat. Biotechnol.* 28: 817–25.

670 Fraga MF, Ballestar E, Paz MF, Ropero S, Setien F, Ballestar ML, Heine-Suñer D,  
671 Cigudosa JC, Urioste M, Benitez J, et al. 2005. Epigenetic differences arise during the  
672 lifetime of monozygotic twins. *Proc. Natl. Acad. Sci. USA* 102: 10604–9.

673 Gertz J, Varley KE, Reddy TE, Bowling KM, Pauli F, Parker SL, Kucera KS, Willard HF,  
674 Myers RM. 2011. Analysis of dna methylation in a three-generation family reveals  
675 widespread genetic influence on epigenetic regulation. *PLoS Genet.* 7.

676 Gervin K, Hammerø M, Akselsen HE, Moe R, Nygård H, Brandt I, Gjessing HK, Harris  
677 JR, Undlien DE, Lyle R. 2011. Extensive variation and low heritability of DNA  
678 methylation identified in a twin study. *Genome Res.* 21: 1813–21.

679 Gibbs JR, van der Brug MP, Hernandez DG, Traynor BJ, Nalls MA, Lai SL, Arepalli S,  
680 Dillman A, Rafferty IP, Troncoso J, et al. 2010. Abundant quantitative trait loci exist for  
681 DNA methylation and gene expression in human brain. *PLoS Genet.* 6: e1000952.

682 Gordon L, Joo JE, Powell JE, Ollikainen M, Novakovic B, Li X, Andronikos R,  
683 Cruickshank MN, Conneely KN, Smith AK, et al. 2012. Neonatal DNA methylation  
684 profile in human twins is specified by a complex interplay between intrauterine  
685 environmental and genetic factors, subject to tissue-specific influence. *Genome Res.*  
686 22: 1395–406.

687 Gosselin D, Link VM, Romanoski CE, Fonseca GJ, Eichenfield DZ, Spann NJ, Stender  
688 JD, Chun HB, Garner H, Geissmann F, et al. 2014. Environment drives selection and  
689 function of enhancers controlling tissue-specific macrophage identities. *Cell* 159: 1327-  
690 40.

691 Grafodatskaya D, Choufani S, Ferreira JC, Butcher DT, Lou Y, Zhao C, Scherer SW,  
692 Weksberg R. 2010. EBV transformation and cell culturing destabilizes DNA methylation  
693 in human lymphoblastoid cell lines. *Genomics* 95:73-83

694 Grundberg E, Meduri E, Sandling JK, Hedman AK, Keildson S, Buil A, Busche S, Yuan  
695 W, Nisbet J, Sekowska M, et al. 2013 Global analysis of dna methylation variation in  
696 adipose tissue from twins reveals links to disease-associated variants in distal  
697 regulatory elements. *Am. J. Hum. Genet.* 93: 876–90.

698 Grundberg E, Small KS, Hedman ÅK, Nica AC, Buil A, Keildson S, Bell JT, Yang TP,  
699 Meduri E, Barrett A, et al. 2012. Mapping cis- and trans-regulatory effects across  
700 multiple tissues in twins. *Nat. Genet.* 44: 1084–9.

701 Guintivano J, Aryee MJ, Kaminsky ZA. 2013. A cell epigenotype specific model for the  
702 correction of brain cellular heterogeneity bias and its application to age, brain region  
703 and major depression. *Epigenetics* 8: 290–302.

704 Gutierrez-Arcelus M, Lappalainen T, Montgomery SB, Buil A, Ongen H, Yurovsky A,  
705 Bryois J, Giger T, Romano L, Planchon A, et al. 2013. Passive and active DNA  
706 methylation and the interplay with genetic variation in gene regulation. *Elife* 2013: 1–18.

707 Heltemes-Harris LM, Farrar MA. 2012. The role of STAT5 in lymphocyte development  
708 and transformation. *Curr Opin Immunol.* 24: 146-52.

709 Heyn H, Moran S, Hernando-Herraez I, Sayols S, Gomez A, Sandoval J, Monk D, Hata  
710 K, Marques-Bonet T, Wang L, et al. 2013. DNA methylation contributes to natural  
711 human variation. *Genome Res.* 23: 1363–72.

712 Houseman EA, Kelsey KT, Wiencke JK, Marsit CJ. 2015. Cell-composition effects in the  
713 analysis of DNA methylation array data: a mathematical perspective. *BMC*  
714 *Bioinformatics* 16:95

715 Huynh JL, Garg P, Thin TH, Yoo S, Dutta R, Trapp BD, Haroutunian V, Zhu J, Donovan  
716 MJ, Sharp AJ, et al. 2014. Epigenome-wide differences in pathology-free regions of  
717 multiple sclerosis-affected brains. *Nat. Neurosci.* 17: 121–30.

718 Javierre BM, Fernandez AF, Richter J, Al-Shahrour F, Martin-Subero JI, Rodriguez-  
719 Ubreva J, Berdasco M, Fraga MF, O'Hanlon TP, Rider LG, et al. 2010. Changes in the  
720 pattern of DNA methylation associate with twin discordance in systemic lupus  
721 erythematosus. *Genome Res.* 20: 170–9.

722 Jones PA. 2012. Functions of DNA methylation: islands, start sites, gene bodies and  
723 beyond. *Nat. Rev. Genet.* 13: 484–92.

724 Joubert BR, Håberg SE, Nilsen RM, Wang X, Vollset SE, Murphy SK, Huang Z, Hoyo C,  
725 Midttun Ø, Cupul-Uicab LA, et al. 2012. 450K epigenome-wide scan identifies  
726 differential DNA methylation in newborns related to maternal smoking during pregnancy.  
727 *Environ. Health Perspect.* 120: 1425–31.

728 Kok DE, Dhonukshe-Rutten RA, Lute C, Heil SG, Uitterlinden AG, van der Velde N, van  
729 Meurs JB, van Schoor NM, Hooiveld GJ, de Groot LC, et al. 2015. The effects of long-  
730 term daily folic acid and vitamin B12 supplementation on genome-wide DNA  
731 methylation in elderly subjects. *Clin. Epigenetics* 7: 121.

732 Langfelder P, Horvath S. 2008. WGCNA: an R package for weighted correlation  
733 network analysis. *BMC Bioinformatics* 9: 559.

734 Lavin Y, Winter D, Blecher-Gonen R, David E, Keren-Shaul H, Merad M, Jung S, Amit I.  
735 2014. Tissue-resident macrophage enhancer landscapes are shaped by the local  
736 microenvironment. *Cell* 159: 1312-26.

737 Lehne B, Drong AW, Loh M, Zhang W, Scott WR, Tan ST, Afzal U, Scott J, Jarvelin MR,  
738 Elliott P, et al. 2015. A coherent approach for analysis of the Illumina  
739 HumanMethylation450 BeadChip improves data quality and performance in epigenome-  
740 wide association studies. *Genome Biol.* 16: 37.

741 Liu L, Li Y, Tollefsbol TO. 2008. Gene-environment interactions and epigenetic basis of  
742 human diseases. *Curr. Issues Mol. Biol.* 10(1-2): 25–36.

743 Liu Y, Ding J, Reynolds LM, Lohman K, Register TC, De La Fuente A, Howard TD,  
744 Hawkins GA, Cui W, Morris J, Smith SG, et al. 2013. Methylomics of gene expression in  
745 human monocytes. *Hum. Mol. Genet.* 22: 5065–74.

746 Lunnon K, Smith R, Hannon E, De Jager PL, Srivastava G, Volta M, Troakes C, Al-  
747 Sarraj S, Burrage J, Macdonald R, et al. 2014. Methylomic profiling implicates cortical  
748 deregulation of ANK1 in Alzheimer's disease. *Nat. Neurosci.* 17:1164–70.

749 McDaniell R1, Lee BK, Song L, Liu Z, Boyle AP, Erdos MR, Scott LJ, Morken MA,  
750 Kucera KS, Battenhouse A, et al. 2010. Heritable individual-specific and allele-specific  
751 chromatin signatures in humans. *Science* 328: 235-9.

752 McEvoy BP, Powell JE, Goddard ME, Visscher PM. 2011. Human population dispersal  
753 “Out of Africa” estimated from linkage disequilibrium and allele frequencies of SNPs.  
754 *Genome Res.* 21: 821–9.

755 McRae AF, Powell JE, Henders AK, Bowdler L, Hemani G, Shah S, Painter JN, Martin  
756 NG, Visscher PM, Montgomery GW. 2014 Contribution of genetic variation to  
757 transgenerational inheritance of DNA methylation. *Genome Biol.* 15: R73.

758 Multhaup ML, Seldin MM, Jaffe AE, Lei X, Kirchner H, Mondal P, Li Y, Rodriguez V,  
759 Drong A, Hussain M, et al. 2015. Mouse-human experimental epigenetic analysis  
760 unmasks dietary targets and genetic liability for diabetic phenotypes. *Cell Metab.* 21:  
761 138–49.

762 Myers S, Bottolo L, Freeman C, McVean G, Donnelly P. 2005. A fine-scale map of  
763 recombination rates and hotspots across the human genome. *Science* 310: 321–4.

764 Oey H, Isbel L, Hickey P, Ebaid B, Whitelaw E. 2015. Genetic and epigenetic variation  
765 among inbred mouse littermates: identification of inter-individual differentially  
766 methylated regions. *Epigenetics Chromatin* 8: 54.

767 Ollikainen M, Smith KR, Joo EJ, Ng HK, Andronikos R, Novakovic B, Abdul Aziz NK,  
768 Carlin JB, Morley R, Saffery R, et al. 2010. DNA methylation analysis of multiple tissues  
769 from newborn twins reveals both genetic and intrauterine components to variation in the  
770 human neonatal epigenome. *Hum. Mol. Genet.* 19: 4176–88.

771 Pidsley R, Viana J, Hannon E, Spiers H, Troakes C, Al-Saraj S, Mechawar N, Turecki  
772 G, Schalkwyk LC, Bray NJ, et al. 2014. Methylomic profiling of human brain tissue  
773 supports a neurodevelopmental origin for schizophrenia. *Genome Biol.* 15: 483.

774 Sabeti PC, Reich DE, Higgins JM, Levine HZ, Richter DJ, Schaffner SF, Gabriel SB,  
775 Platko JV, Patterson NJ, McDonald GJ, et al. 2002. Detecting recent positive selection  
776 in the human genome from haplotype structure. *Nature* 419: 832–7.

777 Sheffield NC, Thurman RE, Song L, Safi A, Stamatoyannopoulos JA, Lenhard B,  
778 Crawford GE, Furey TS. 2013. Patterns of regulatory activity across diverse human cell  
779 types predict tissue identity, transcription factor binding, and long-range interactions.  
780 *Genome Res.* 23: 777–88.

781 Sudmant PH, Rausch T, Gardner EJ, Handsaker RE, Abyzov A, Huddleston J, Zhang  
782 Y, Ye K, Jun G, Fritz MH, et al. 2015. An integrated map of structural variation in 2,504  
783 human genomes. *Nature* 526: 75–81.

784 Tammen SA, Friso S, Choi SW. 2013. Epigenetics: The link between nature and  
785 nurture. *Mol. Aspects Med.* 34(4): 753–64.

786 The International HapMap Consortium. 2005. A haplotype map of the human genome.  
787 *Nature* 437: 1299–320.

788 The International HapMap Consortium. 2007. A second generation human haplotype  
789 map of over 3.1 million SNPs. *Nature* 449: 851–61.

790 The International HapMap Consortium. 2010. Integrating common and rare genetic  
791 variation in diverse human populations. *Nature* 467: 52–8.

792 *Transl. Psychiatry* 2: e150.

793 Tsaprouni LG, Yang TP, Bell J, Dick KJ, Kanoni S, Nisbet J, Viñuela A, Grundberg E,  
794 Nelson CP, Meduri E, et al. 2014. Cigarette smoking reduces DNA methylation levels at  
795 multiple genomic loci but the effect is partially reversible upon cessation. *Epigenetics* 9:  
796 1382–96.

797 Unternaehrer E, Luers P, Mill J, Dempster E, Meyer AH, Staehli S, Lieb R, Hellhammer  
798 DH, Meinschmidt G. 2012. Dynamic changes in DNA methylation of stress-associated  
799 genes (OXTR, BDNF) after acute psychosocial stress.



800 Waterland RA, Kellermayer R, Laritsky E, Rayco-Solon P, Harris RA, Travisano M,  
801 Zhang W, Torskaya MS, Zhang J, Shen L, et al. 2010. Season of conception in rural  
802 gambia affects DNA methylation at putative human metastable epialleles. *PLoS Genet.*  
803 6: 1–10.

804 Watson CT, Roussos P, Garg P, Ho DJ, Azam N, Katsel PL, Haroutunian V, Sharp AJ.  
805 2016. Genome-wide DNA methylation profiling in the superior temporal gyrus reveals  
806 epigenetic signatures associated with Alzheimer. *Genome Med.* 8: 5.

807 Welter D, MacArthur J, Morales J, Burdett T, Hall P, Junkins H, Klemm A, Flicek P,  
808 Manolio T, Hindorf L, et al. 2014. The NHGRI GWAS Catalog, a curated resource of  
809 SNP-trait associations. *Nucleic Acids Res.* 42: D1001-6.

810 Zaidi S, Choi M, Wakimoto H, Ma L, Jiang J, Overton JD, Romano-Adesman A,  
811 Bjornson RD, Breitbart RE, Brown KK, et al. 2013. De novo mutations in histone-  
812 modifying genes in congenital heart disease. *Nature* 498: 220–3.

813 Zhang B, Horvath S. 2005. A general framework for weighted gene co-expression  
814 network analysis. *Stat. Appl. Genet. Mol. Biol.* 4: Article17.

815 Zhang D, Cheng L, Badner JA, Chen C, Chen Q, Luo W, Craig DW, Redman M,  
816 Gershon ES, Liu C. 2010. Genetic Control of Individual Differences in Gene-Specific  
817 Methylation in Human Brain. *Am. J. Hum. Genet.* 86: 411–9.

818

819 ***AUTHORS' CONTRIBUTION***

820 PG, RJ and AJS designed the research. PG performed the bioinformatics analysis. RJ  
821 prepared the biological material and CW performed data analysis for time-point  
822 experiments. PG, CW and AJS wrote the manuscript with valuable contribution from RJ.  
823 AJS coordinated the study. All authors read and approved the final manuscript.

824

825

826 **ACKNOWLEDGMENTS**

827 This work was supported by NIH grant HG006696 and research grant 6-FY13-92 from  
828 the March of Dimes to AJS, and a Beatriu de Pinós Postdoctoral Fellowship to RSJ  
829 (2011BP-A00515).

830

## 831 **Legends to Supplementary Figures**

832

### 833 **Supplementary Fig. S1. Pairwise correlation between shared VMRs reveals**

834 **varying levels of similarity across cell types.** VMRs found in fibroblasts show

835 relatively low correlations with other cells types, whereas there is much greater similarity

836 in VMRs between T-cells and B-cells (both of which are types of blood cell), and even

837 greater similarity between VMRs found in glia and neurons (both of which are derived

838 from brain).

839

### 840 **Supplementary Fig. S2. Heat maps showing pair wise correlation values between**

841 **all CpGs located within VMRs defined in neurons, glia, B cells and T cells.** In each

842 plot, CpGs on both axes are ordered by genomic position, revealing the presence of

843 multiple loci located on different chromosomes that show highly correlated methylation

844 levels in *trans*.

845

### 846 **Supplementary Fig. S3. Examples of networks of genes associated with co-**

847 **regulated VMRs identified in four cell types.** The outermost circle in each Circos plot

848 represents segments of each chromosome. Gene names are shown inside. Blue tick

849 marks on the inner grey shaded band represent each VMR. The black curved lines

850 connect the VMRs in the network that have methylation levels with pair wise absolute

851 correlation values  $R \geq 0.7$ .

852

853 **Supplementary Fig. S4. Results of Gene Ontology (GO) analysis of genes**  
854 **associated with networks of co-regulated VMRs identified by WCGNA. (A) T cells,**  
855 **(B) glia, and (C) neurons.**

856

857

858 **Legends to Supplementary Tables**

859

860 **Supplementary Table S1. VMRs defined in neurons, glia, B cells, T cells and**  
861 **fibroblasts.**

862

863 **Supplementary Table S2. Enrichment analysis for various genomic features**  
864 **overlapping VMRs in five cell types.**

865

866 **Supplementary Table S3. Networks of co-regulated VMRs defined by WCGNA in**  
867 **neurons, glia, B cells, T cells and fibroblasts.**

868

869 **Supplementary Table S4. Genes associated with networks of co-regulated VMRs**  
870 **defined by WCGNA in neurons, glia, B cells, T cells and fibroblasts.** Based on the  
871 Networks of co-regulated VMRs defined by WCGNA (Supplementary Table S3), VMRs  
872 were associated with the genes they regulate based on either their localization within  
873  $\pm 2$ kb of transcription start sites, overlap with DNaseI hypersensitive sites that showed  
874 significant association *in cis* with gene expression levels (Sheffield et al., 2013), and  
875 significant associations between methylation and gene expression levels (eQTM) in T  
876 cells, B cells, fibroblasts (Gutierrez-Arcelus et al., 2013) and monocytes (Liu et al.,  
877 2013).

878

879 **Supplementary Table S5. Significantly enriched Gene Ontology (GO) categories**  
880 **associated with genes linked with networks of co-regulated VMRs in neurons,**

881 **glia, B cells, T cells and fibroblasts.** For each module with at least 10 constituent  
882 genes, we performed Gene Ontology enrichment analysis using GOrilla (Eden et al.,  
883 2009).

884

885 **Supplementary Table S6. Significantly enriched transcription factor binding sites**  
886 **overlapping networks of co-regulated VMRs defined by WCGNA in neurons, glia,**  
887 **B cells, T cells and fibroblasts.**

888

889 **Supplementary Table S7. VMRs defined by analysis of methylation in 26**  
890 **individuals, representing 13 pairs of monozygotic twins.**

891

892 **Supplementary Table S8. VMRs identified in cultured isogenic fibroblasts grown**  
893 **under conditions of increasing cell density and nutrient deprivation.**

894

895 **Supplementary Table S9. Results of GO enrichment analysis using genes**  
896 **associated with VMRs identified in cultured isogenic fibroblasts grown under**  
897 **conditions of increasing cell density and nutrient deprivation.**
